# Supplementary material for: NMR reveals a dynamic allosteric pathway in thrombin
Source: PubMed Central journal article supplement (PMC5216386; doi:10.1038/srep39575), 2017-01-06
Supplement: srep39575-s1.pdf [file srep39575-s1.pdf]

Supplementary Figure for

**NMR reveals a dynamic allosteric pathway in thrombin**

Lindsey D. Handley<sup>1,†</sup>, Brian Fuglestad<sup>1,3,†</sup>, Kyle Stearns<sup>1</sup>, Marco Tonelli<sup>2</sup>, R. Bryn Fenwick<sup>4</sup>, Phineus R. L.

Markwick and Elizabeth A. Komives<sup>1\*</sup>

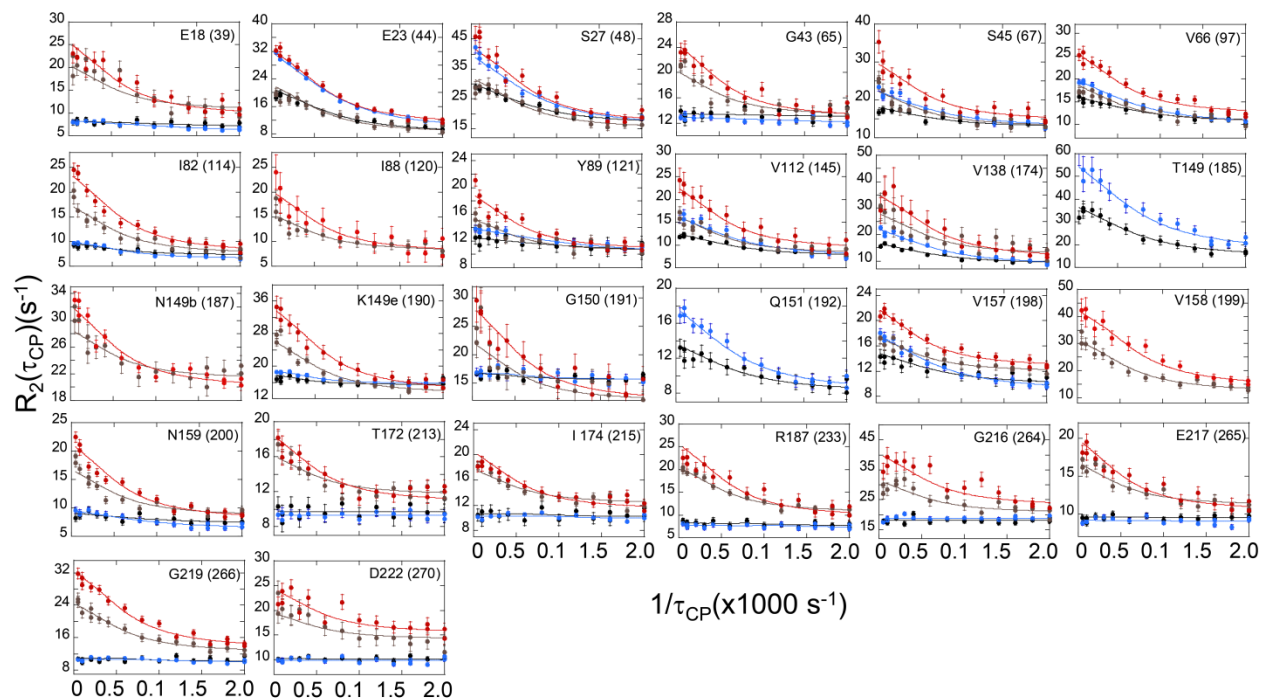

**Supplementary Figure 1.** Relaxation dispersion curves for apo-thrombin (800 MHz in red, 600 MHz in brown) and PPACK-thrombin (800 MHz in blue, 600 MHz in black). Curves are global fits from GLOVE.
